# Supplementary material for: In Vitro Nano-Polystyrene Toxicity: Metabolic Dysfunctions and Cytoprotective Responses of Human Spermatozoa
Source: MDPI journal article supplement (doi:10.3390/biology12040624), 2023-04-20
Supplement: s1 [file s1]

## Supplementary materials:

**Table S1.** Summary of motility parameters measured with CASA plugin.

|              | CTRL       | 50 nm      |     |            |         |            |         | 100 nm      |     |            |     |            |      |
|--------------|------------|------------|-----|------------|---------|------------|---------|-------------|-----|------------|-----|------------|------|
|              |            | 0.1 µg/ml  | p   | 0.5 µg/ml  | p       | 1 µg/ml    | p       | 0.1 µg/ml   | p   | 0.5 µg/ml  | p   | 1 µg/ml    | p    |
| Motility (%) | 75.63±0.02 | 67.59±0.03 | .70 | 36.34±0.01 | <.001** | 22.77±0.01 | <.001** | 69±0.03     | .79 | 70.35±0.03 | .92 | 71.79±0.01 | 0.97 |
| VCL          | 91.9±0.03  | 75.75±0.04 | .91 | 95.77±0.01 | .1      | 60.68±0.01 | .001**  | 119.34±0.01 | .63 | 72.42±0.02 | .88 | 93.07±0.02 | .1   |
| VAP          | 53.56±0.04 | 57.52±0.02 | .99 | 65.23±0.02 | .51     | 61.03±0.03 | .83     | 67.58±0.02  | .30 | 53.08±0.03 | .1  | 72.71±0.01 | .06  |
| VLS          | 48.44±0.01 | 54.24±0.03 | .95 | 59.75±0.03 | .46     | 44.49±0.04 | .98     | 60.01±0.03  | .44 | 50.35±0.01 | .99 | 62.64±0.03 | .76  |
| LIN          | 0.9±0.01   | 0.93±0.03  | .83 | 0.91±0.02  | 1       | 0.74±0.02  | <.001** | 0.88±0.02   | .94 | 0.94±0.01  | .66 | 0.95±0.01  | .4   |
| WOB          | 0.70±0.01  | 0.68±0.04  | .47 | 0.67±0.02  | .32     | 1±0.02     | <.001** | 0.76±0.02   | .34 | 0.74±0.01  | .07 | 0.78±0.01  | .06  |
| BCF          | 27.07±0.02 | 23.33±0.02 | .07 | 24.51±0.02 | .08     | 27.21±0.02 | .42     | 25.54±0.02  | .36 | 25.78±0.02 | .09 | 23.33±0.04 | .12  |

Data are showed as mean ± standard deviation. Motility is showed as % mean ± standard deviation. Statistically significant differences are indicated with the symbols \* (p<0.05) and \*\* (p<0.01).

**Table S2.** Summary of monitored parameters.

|                       | CTRL       | 50 nm      |         |            |         |            |         | 100 nm      |        |            |        |             |        |
|-----------------------|------------|------------|---------|------------|---------|------------|---------|-------------|--------|------------|--------|-------------|--------|
|                       |            | 0.1 µg/ml  | p       | 0.5 µg/ml  | p       | 1 µg/ml    | p       | 0.1 µg/ml   | p      | 0.5 µg/ml  | p      | 1 µg/ml     | p      |
| Intact Membrane (%)   | 41.15±0.01 | 27.87±0.02 | .744    | 36.02±0.03 | .976    | 16.52±0.03 | .015*   | 40.31±0.02  | .99    | 39.84±0.03 | .99    | 36.19±0.02  | .81    |
| Acrosome Damage (%)   | 48.14±0.03 | 55.65±0.03 | .423    | 61.37±0.02 | .083    | 64.54±0.01 | .016*   | 52.65±0.01  | .08    | 59.69±0.03 | .1     | 65.9±0.02   | .02*   |
| DNA Fragmentation (%) | 36.64±0.03 | 51.71±0.02 | <.001** | 52.69±0.01 | <.001** | 52.5±0.02  | <.001** | 32±0.03     | .87    | 29.81±0.04 | .69    | 43.28±0.02  | .71    |
| Normalized sORP       | 1.375±0.03 | 1.525±0.01 | .011*   | 1.53±0.01  | .01*    | 1.8±0.02   | .005**  | 1.585±0.007 | .002** | 1.59±0.014 | .002** | 1.65±0.014  | .001** |
| ROS production (%)    | 1±0.01     | 9±0.01     | .206    | 17±0.03    | .023*   | 16±0.04    | .03*    | 12±0.02     | .01*   | 9±0.02     | .03*   | 11±0.01     | .01*   |
| HSP70 expression (%)  | 8.79±0.01  | 57.91±0.02 | <.001** | 65.33±0.02 | <.001** | 65.29±0.01 | <.001** | 11.06±0.001 | .25    | 10.5±0.007 | .42    | 12.32±0.018 | .07    |

Data are showed as % mean ± standard deviation. Statistically significant differences are indicated with the symbols \* (p<0.05) and \*\* (p<0.01).

**Table S3.** Summarized data of mitochondrial activity.

|               | CTRL     | 50 nm     |         |           |         |          |         | 100 nm    |     |           |     |          |     |
|---------------|----------|-----------|---------|-----------|---------|----------|---------|-----------|-----|-----------|-----|----------|-----|
|               |          | 0.1 µg/ml | p       | 0.5 µg/ml | p       | 1 µg/ml  | p       | 0.1 µg/ml | p   | 0.5 µg/ml | p   | 1 µg/ml  | p   |
| I class (%)   | 67±0.007 | 32±0.002  | <.001** | 15±0.001  | <.001** | 9±0.002  | <.001** | 60±0.004  | .12 | 59±0.005  | .07 | 57±0.006 | .08 |
| II class (%)  | 15±0.003 | 12±0.001  | .22     | 5±0.003   | <.001** | 7±0.001  | <.001** | 17±0.002  | .21 | 15±0.002  | .09 | 20±0.003 | .09 |
| III class (%) | 11±0.04  | 17±0.002  | .15     | 20±0.002  | .24     | 14±0.003 | .12     | 16±0.006  | .24 | 11±0.003  | .15 | 12±0.001 | .32 |
| IV class (%)  | 8±0.014  | 39±0.003  | <.001** | 70±0.001  | <.001** | 70±0.002 | <.001** | 7±0.001   | .17 | 15±0.002  | .12 | 11±0.003 | .12 |

Data are showed as % mean ± standard deviation. Statistically significant differences are indicated with the symbols \* (p<0.05) and \*\* (p<0.01).
